# Supplementary material for: Bioactive strawberry fruit (Arbutus unedo L.) extract remedies paraquat-induced neurotoxicity in the offspring prenatally exposed rats
Source: Front Neurosci. 2023 Oct 12;17:1244603. doi: 10.3389/fnins.2023.1244603 (PMC10600521; doi:10.3389/fnins.2023.1244603)
Supplement: Supplementary file 1 [file Data_Sheet_1.xlsx]

## Sheet: Raw data % scavenging effect
	Arbutus Extract (AU)
	DPPH test			ABTS test
Concentration (µg/ml)	Y1	Y2	Y3	Y1	Y2	Y3
105	88.4205	88.6181	88.85	99.3203	99.3959	99.3506
89.25	85.7058	85.8841	84.9088	99.1693	99.2373	99.19
68.25	75.4829	75.0074	75.231	99.0787	98.9956	99.0099
52.5	70.2422	70.0446	70.271	98.905	98.8295	98.6899
26.25	63.7741	63.3581	63.9876	81.9061	81.7065	81.9987
10.5	52.6003	52.838	52.0789	42.2678	42.8668	42.0369
5.25	45.5869	45.1114	45.3246	21.0077	21.489	22.3861
	Ascorbic Acid
	DPPH test			ABTS test
Concentration (µg/ml)	Y1	Y2	Y3	Y1	Y2	Y3
10	71.6984	71.0253	71.1415	77.2164	77.7753	77.5785
8.5	69.9257	69.6181	69.5181	66.8654	66.206	65.079
6.5	60.7519	61.6345	61.7392	53.7985	52.0012	52.7889
5	55.0684	55.7207	56.1209	43.581	43.5961	43.4097
2.5	49.7177	49.9257	49.7981	25.4517	24.1889	24.6578
1	46.6568	46.5676	46.7855	16.8674	15.892	15.0689
0.5	40.3076	40.7132	40.4182	8.83673	7.98535	8.93043

## Sheet: Statistical Analysis 
Arbutus Extract (AU)				Ascorbic Acid
	DPPH test	ABTS test			DPPH test	ABTS test
Best-fit values				Best-fit values
Slope	0.408	0.6962		Slope	3.121	7.026
Y-intercept	47.92	41.96		Y-intercept	41.26	7.198
X-intercept	-117.5	-60.27		X-intercept	-13.22	-1.025
1/slope	2.451	1.436		1/slope	0.3204	0.1423
Std. Error				Std. Error
Slope	0.01799	0.1043		Slope	0.1087	0.08717
Y-intercept	1.122	6.505		Y-intercept	0.6456	0.5178
95% Confidence Intervals				95% Confidence Intervals
Slope	0.3703 to 0.4456	0.4780 to 0.9145		Slope	2.893 to 3.348	6.843 to 7.208
Y-intercept	45.57 to 50.27	28.34 to 55.58		Y-intercept	39.91 to 42.61	6.115 to 8.282
X-intercept	-134.9 to -102.9	-112.9 to -31.93		X-intercept	-14.67 to -11.97	-1.205 to -0.8518
Goodness of Fit				Goodness of Fit
R square	0.9644	0.7011		R square	0.9775	0.9971
Sy.x	2.96	17.16		Sy.x	1.703	1.366
Is slope significantly non-zero?				Is slope significantly non-zero?
F	514.2	44.57		F	824.6	6496
DFn, DFd	1, 19	1, 19		DFn, DFd	1, 19	1, 19
P value	<0.0001	<0.0001		P value	<0.0001	<0.0001
Deviation from zero?	Significant	Significant		Deviation from zero?	Significant	Significant
Equation	Y = 0.4080*X + 47.92	Y = 0.6962*X + 41.96		Equation	Y = 3.121*X + 41.26	Y = 7.026*X + 7.198
Data				Data
Number of X values	21	21		Number of X values	21	21
Maximum number of Y replicates	3	3		Maximum number of Y replicates	3	3
Total number of values	21	21		Total number of values	21	21
Number of missing values	0	0		Number of missing values	0	0
