# Supplementary material for: Bioactive strawberry fruit (Arbutus unedo L.) extract remedies paraquat-induced neurotoxicity in the offspring prenatally exposed rats
Source: Front Neurosci. 2023 Oct 12;17:1244603. doi: 10.3389/fnins.2023.1244603 (PMC10600521; doi:10.3389/fnins.2023.1244603)
Supplement: Supplementary file 2 [file Data_Sheet_2.xlsx]

## Sheet: Raw data, Figure 3, A
	PQ (μM)				AU extract (μg/mL)
Ctrl	10	100	250	500	10	100	1000	5000	10000
109.26	88.432	105.017	79.7241	36.5054	86.77	97.95	97.28	101.94	88.13
102.435	110.319	83.5923	56.5146	21.3104	106.01	123.34	106.99	84.72	96.39
91.9034	87.824	96.2527	62.9232	58.3859	73.29	101.39	114.87	108.72	63.35
107.162	121.459	92.7859	66.8434	41.232	107.75	84.28	90.76	101.55	60.94
87.8044	79.9595	77.8133	65.466	18.2094	114.98	87.45	45.36	113.28	102.24
101.553	110.398	86.0128	72.5483	45.5987	92.3	88.06	107.19	94.86	94.22
119.324	109.594	75.5594	57.4226	41.9576	64.31	77.55	117.53	74.49	75.73
93.6097	95.3748	95.0217	46.6992	25.5467	93.83	78.89	120.68	83.47	78.48

## Sheet:  Statistical Analysis,Figure 3A
	Table Analyzed	MTT test						Number of families	1
	Data sets analyzed	A-J						Number of comparisons per family	9
								Alpha	0.05
	One-way ANOVA summary
	F	15.19						Sidak's multiple comparisons test	Mean Diff.	95.00% CI of diff.	Significant?	Summary	Adjusted P Value	A-?
	P value	<0.0001						Ctrl vs. 10	1.211	-20.16 to 22.58	No	ns	>0.9999	B	10
	P value summary	****						Ctrl vs. 100	12.62	-8.746 to 33.99	No	ns	0.5981	C	100
	Significant diff. among means (P < 0.05)?	Yes						Ctrl vs. 250	38.11	16.74 to 59.48	Yes	****	<0.0001	D	250
	R square	0.6613						Ctrl vs. 500	65.54	44.17 to 86.91	Yes	****	<0.0001	E	500
								Ctrl vs. 10	9.226	-12.14 to 30.60	No	ns	0.8957	F	10
	Brown-Forsythe test							Ctrl vs. 100	9.268	-12.10 to 30.64	No	ns	0.8932	G	100
	F (DFn, DFd)	0.5360 (9, 70)						Ctrl vs. 1000	1.549	-19.82 to 22.92	No	ns	>0.9999	H	1000
	P value	0.8435						Ctrl vs. 5000	6.253	-15.12 to 27.62	No	ns	0.9909	I	5000
	P value summary	ns						Ctrl vs. 10000	19.2	-2.174 to 40.57	No	ns	0.1072	J	10000
	Are SDs significantly different (P < 0.05)?	No
								Test details	Mean 1	Mean 2	Mean Diff.	SE of diff.	n1	n2	t	DF
	Bartlett's test							Ctrl vs. 10	101.6	100.4	1.211	7.489	8	8	0.1617	70
	Bartlett's statistic (corrected)	9.666						Ctrl vs. 100	101.6	89.01	12.62	7.489	8	8	1.686	70
	P value	0.3782						Ctrl vs. 250	101.6	63.52	38.11	7.489	8	8	5.089	70
	P value summary	ns						Ctrl vs. 500	101.6	36.09	65.54	7.489	8	8	8.751	70
	Are SDs significantly different (P < 0.05)?	No						Ctrl vs. 10	101.6	92.41	9.226	7.489	8	8	1.232	70
								Ctrl vs. 100	101.6	92.36	9.268	7.489	8	8	1.237	70
	ANOVA table	SS	DF	MS	F (DFn, DFd)	P value		Ctrl vs. 1000	101.6	100.1	1.549	7.489	8	8	0.2068	70
	Treatment (between columns)	30668	9	3408	F (9, 70) = 15.19	P<0.0001		Ctrl vs. 5000	101.6	95.38	6.253	7.489	8	8	0.8349	70
	Residual (within columns)	15705	70	224.4				Ctrl vs. 10000	101.6	82.44	19.2	7.489	8	8	2.563	70
	Total	46373	79
	Data summary
	Number of treatments (columns)	10
	Number of values (total)	80

## Sheet: Raw data, Figure 3, B
	Saline								AU1								AU5
	Y1	Y2	Y3	Y4	Y5	Y6	Y7	Y8	Y1	Y2	Y3	Y4	Y5	Y6	Y7	Y8	Y1	Y2	Y3	Y4	Y5	Y6	Y7	Y8
Saline	109.26	102.435	91.9034	107.162	87.8044	101.553	119.324	93.6097	97.28	106.99	114.87	90.76	45.36	107.19	117.53	120.68	101.94	84.72	108.72	101.55	113.28	94.86	74.49	83.47
PQ	79.7241	56.5146	62.9232	66.8434	65.466	72.5483	57.4226	46.6992	79.88	53.45	79.48	90.37	85.66	69.84	70.79	70.23	74.85	108.51	78.12	66.51	107.79	105.8	101.56	103.91

## Sheet:  Statistical Analysis,Figure 3B
Table Analyzed	MTT
							Compare cell means regardless of rows and columns
Two-way ANOVA	Ordinary
Alpha	0.05						Number of families	1
							Number of comparisons per family	15
Source of Variation	% of total variation	P value	P value summary	Significant?			Alpha	0.05
Interaction	13.83	0.0065	**	Yes
Row Factor	29.31	<0.0001	****	Yes			Bonferroni's multiple comparisons test	Mean Diff.	95.00% CI of diff.	Significant?	Summary	Adjusted P Value
Column Factor	5.811	0.1039	ns	No
							Saline:Saline vs. Saline:AU1	1.549	-22.32 to 25.42	No	ns	>0.9999
ANOVA table	SS	DF	MS	F (DFn, DFd)	P value		Saline:Saline vs. Saline:AU5	6.253	-17.62 to 30.12	No	ns	>0.9999
Interaction	2677	2	1339	F (2, 42) = 5.690	P=0.0065		Saline:Saline vs. PQ:Saline	38.11	14.25 to 61.98	Yes	***	0.0002
Row Factor	5673	1	5673	F (1, 42) = 24.12	P<0.0001		Saline:Saline vs. PQ:AU1	26.67	2.801 to 50.54	Yes	*	0.0179
Column Factor	1125	2	562.3	F (2, 42) = 2.391	P=0.1039		Saline:Saline vs. PQ:AU5	8.25	-15.62 to 32.12	No	ns	>0.9999
Residual	9880	42	235.2				Saline:AU1 vs. Saline:AU5	4.704	-19.16 to 28.57	No	ns	>0.9999
							Saline:AU1 vs. PQ:Saline	36.56	12.70 to 60.43	Yes	***	0.0003
Difference between row means							Saline:AU1 vs. PQ:AU1	25.12	1.252 to 48.99	Yes	*	0.0318
Mean of Saline	99.03						Saline:AU1 vs. PQ:AU5	6.701	-17.17 to 30.57	No	ns	>0.9999
Mean of PQ	77.29						Saline:AU5 vs. PQ:Saline	31.86	7.993 to 55.73	Yes	**	0.0023
Difference between means	21.74						Saline:AU5 vs. PQ:AU1	20.42	-3.452 to 44.28	No	ns	0.1643
SE of difference	4.427						Saline:AU5 vs. PQ:AU5	1.998	-21.87 to 25.87	No	ns	>0.9999
95% CI of difference	12.81 to 30.68						PQ:Saline vs. PQ:AU1	-11.44	-35.31 to 12.42	No	ns	>0.9999
							PQ:Saline vs. PQ:AU5	-29.86	-53.73 to -5.996	Yes	**	0.0052
							PQ:AU1 vs. PQ:AU5	-18.42	-42.29 to 5.449	No	ns	0.3122
							Test details	Mean 1	Mean 2	Mean Diff.	SE of diff.	N1	N2	t	DF
							Saline:Saline vs. Saline:AU1	101.6	100.1	1.549	7.669	8	8	0.202	42
							Saline:Saline vs. Saline:AU5	101.6	95.38	6.253	7.669	8	8	0.8154	42
							Saline:Saline vs. PQ:Saline	101.6	63.52	38.11	7.669	8	8	4.97	42
							Saline:Saline vs. PQ:AU1	101.6	74.96	26.67	7.669	8	8	3.478	42
							Saline:Saline vs. PQ:AU5	101.6	93.38	8.25	7.669	8	8	1.076	42
							Saline:AU1 vs. Saline:AU5	100.1	95.38	4.704	7.669	8	8	0.6134	42
							Saline:AU1 vs. PQ:Saline	100.1	63.52	36.56	7.669	8	8	4.768	42
							Saline:AU1 vs. PQ:AU1	100.1	74.96	25.12	7.669	8	8	3.276	42
							Saline:AU1 vs. PQ:AU5	100.1	93.38	6.701	7.669	8	8	0.8739	42
							Saline:AU5 vs. PQ:Saline	95.38	63.52	31.86	7.669	8	8	4.155	42
							Saline:AU5 vs. PQ:AU1	95.38	74.96	20.42	7.669	8	8	2.662	42
							Saline:AU5 vs. PQ:AU5	95.38	93.38	1.998	7.669	8	8	0.2605	42
							PQ:Saline vs. PQ:AU1	63.52	74.96	-11.44	7.669	8	8	1.492	42
							PQ:Saline vs. PQ:AU5	63.52	93.38	-29.86	7.669	8	8	3.894	42
							PQ:AU1 vs. PQ:AU5	74.96	93.38	-18.42	7.669	8	8	2.402	42
