# Supplementary material for: Bioactive strawberry fruit (Arbutus unedo L.) extract remedies paraquat-induced neurotoxicity in the offspring prenatally exposed rats
Source: Front Neurosci. 2023 Oct 12;17:1244603. doi: 10.3389/fnins.2023.1244603 (PMC10600521; doi:10.3389/fnins.2023.1244603)
Supplement: Supplementary file 3 [file Data_Sheet_3.xlsx]

## Sheet: profile of OCR  (Figure 4A)
Time (minutes)	Vehicle					PQ					AU					AU/PQ
	Y1	Y2	Y3	Y4	Y5	Y1	Y2	Y3	Y4	Y5	Y1	Y2	Y3	Y4	Y5	Y1	Y2	Y3	Y4	Y5
1.3	132.227	119.37	133.81	125.52	164.323	179.593	168.347	176.883	159.27	201.053	153.99	131.53	145.807	148.677	142.95	150.393	140.993	139.353	144.957	148.06
9.9	147.657	118.717	132.343	135.423	171.957	177.745	168.653	180.107	173.29	208.267	160.373	125.813	154.61	147.987	146.087	139.703	140.997	143.247	146.997	148.873
18.4	134.61	122.253	128.653	130.753	161.763	178.088	170.047	173	180.96	214.263	155.613	129.59	148.353	154.063	144.937	145.983	141.77	138.037	141.427	158.287
27	139.36	123.803	126.697	131.013	174.603	144.707	185.223	188.323	194.2	214.157	146.1	130.99	152.693	156.383	148.093	137.63	135.967	130.19	145.74	171.81
37.9	32.0433	31.5667	33.2567	43.5733	46.5933	110.898	117.593	109.173	123.257	136.353	27.1867	31.55	28.9833	42.2533	37.3533	30.91	41.3567	33.5733	34.9467	24.29
46.4	31.8167	30.42	30.6133	44.7567	53.48	109.015	117.257	106.557	110.033	138.257	26.11	35.36	27.53	42.7333	35.5967	29.6933	38.1833	34.7533	38.94	41.6833
55	30.4967	30.3533	28.77	42.2333	48.53	106.902	113.017	110.963	118.123	136.1	26.6633	36.5033	28.1233	48.3833	36.7567	28.6933	39.56	40.57	35.73	43.6633
63.6	32.3533	30.7433	26.1233	43.29	47.0233	161.78	115.077	107.49	116.52	136.467	26.7233	37.0333	28.2633	44.3567	40.86	29.5333	34.2467	36.2133	35.5833	52.3233
72.3	315.65	206.757	250.413	224.607	320.053	218.918	223.853	191.863	189.697	262.883	266.91	259.913	260.293	260.46	256.317	235.18	240.067	248.71	236.203	242.763
80.9	312.587	214.463	280.04	257.65	326.53	218.823	231.033	214.043	205.577	227.3	248.147	246.783	251.127	267.097	250.717	244.517	244.933	246.273	239.407	294.9
89.4	313.987	208.433	282.807	266.99	337.287	219.695	245.07	199.24	227.26	247.567	257.707	259.45	249.26	249.157	256.113	237.303	243.997	246.94	241.623	249.223
98	315.243	221.48	294.44	279.957	353.643	129.02	255.383	215.15	222.707	233.887	270.937	252.403	262.173	259.137	250.703	246.81	237.93	236.277	247.703	245.15
106.7	14.2867	13.2467	10.89	12.0867	15.46	36.5333	44.2933	35.7033	46.7833	39.9967	18.1	20.6333	17.72	17.2333	12.9	19.3	13.3033	16.8433	18.36	15.68
115.3	13.9433	12.9867	9.11	10.8867	12.6467	37.925	38.5867	37.5367	42.9557	35.7785	15.6967	23.8033	18.0233	15.7233	10.8267	25.7733	13.33	16.2767	17.0867	15.52
123.9	15.29	13.3267	7.93	10.5367	13.5667	36.99	36.6233	37.82	39.6088	40.3108	14.0533	23.6567	17.6167	15.3	12.0433	22.51	12.73	16.74	15.7967	14.8633
132.4	14.03	11.43	9.49333	9.27333	11.8667	35.46	39.2867	34.6867	41.7016	38.1809	17.4367	24.8567	18.8333	16.75	10.3133	20.5667	11.7	20.44	16.6833	15.31

## Sheet: Non-Mitochondrial respiration
Raw Data
	Vehicle					AU (1g/kg)
	Y1	Y2	Y3	Y4	Y5	Y1	Y2	Y3	Y4	Y5
Vehicle	13.9433	11.43	7.93	9.27333	11.8667	14.0533	20.6333	17.6167	15.3	10.3133
PQ (20 mg/kg)	35.46	36.6233	34.6867	39.6088	35.7785	19.3	11.7	16.2767	15.7967	14.8633
Statistical Analysis
											Compare cell means regardless of rows and columns
Table Analyzed	Non-Mitochondrial respiration
											Number of families	1
Two-way ANOVA	Ordinary										Number of comparisons per family	6
Alpha	0.05										Alpha	0.05
Source of Variation	% of total variation	P value	P value summary	Significant?							Bonferroni's multiple comparisons test	Mean Diff.	95.00% CI of diff.	Significant?	Summary	Adjusted P Value
Interaction	39.13	<0.0001	****	Yes
Row Factor	39.16	<0.0001	****	Yes							Vehicle:Vehicle vs. Vehicle:AU (1g/kg)	-4.695	-10.04 to 0.6501	No	ns	0.1064
Column Factor	15.65	<0.0001	****	Yes							Vehicle:Vehicle vs. PQ (20 mg/kg):Vehicle	-25.54	-30.89 to -20.20	Yes	****	<0.0001
											Vehicle:Vehicle vs. PQ (20 mg/kg):AU (1g/kg)	-4.699	-10.04 to 0.6461	No	ns	0.106
ANOVA table	SS	DF	MS	F (DFn, DFd)	P value						Vehicle:AU (1g/kg) vs. PQ (20 mg/kg):Vehicle	-20.85	-26.19 to -15.50	Yes	****	<0.0001
Interaction	815.3	1	815.3	F (1, 16) = 103.3	P<0.0001						Vehicle:AU (1g/kg) vs. PQ (20 mg/kg):AU (1g/kg)	-0.004	-5.349 to 5.341	No	ns	>0.9999
Row Factor	815.8	1	815.8	F (1, 16) = 103.4	P<0.0001						PQ (20 mg/kg):Vehicle vs. PQ (20 mg/kg):AU (1g/kg)	20.84	15.50 to 26.19	Yes	****	<0.0001
Column Factor	326	1	326	F (1, 16) = 41.31	P<0.0001
Residual	126.3	16	7.891
											Test details	Mean 1	Mean 2	Mean Diff.	SE of diff.	N1	N2	t	DF
Difference between column means
Mean of Vehicle	23.66										Vehicle:Vehicle vs. Vehicle:AU (1g/kg)	10.89	15.58	-4.695	1.777	5	5	2.642	16
Mean of AU (1g/kg)	15.59										Vehicle:Vehicle vs. PQ (20 mg/kg):Vehicle	10.89	36.43	-25.54	1.777	5	5	14.38	16
Difference between means	8.075										Vehicle:Vehicle vs. PQ (20 mg/kg):AU (1g/kg)	10.89	15.59	-4.699	1.777	5	5	2.645	16
SE of difference	1.256										Vehicle:AU (1g/kg) vs. PQ (20 mg/kg):Vehicle	15.58	36.43	-20.85	1.777	5	5	11.73	16
95% CI of difference	5.412 to 10.74										Vehicle:AU (1g/kg) vs. PQ (20 mg/kg):AU (1g/kg)	15.58	15.59	-0.004	1.777	5	5	0.002251	16
											PQ (20 mg/kg):Vehicle vs. PQ (20 mg/kg):AU (1g/kg)	36.43	15.59	20.84	1.777	5	5	11.73	16
Difference between row means
Mean of Vehicle	13.24
Mean of PQ (20 mg/kg)	26.01
Difference between means	-12.77
SE of difference	1.256
95% CI of difference	-15.44 to -10.11
Interaction CI
Mean diff, A1 - B1	-4.695
Mean diff, A2 - B2	20.84
(A1 -B1) - (A2 - B2)	-25.54
95% CI of difference	-30.87 to -20.21
(B1 - A1) - (B2 - A2)	25.54
95% CI of difference	20.21 to 30.87

## Sheet: Basal Respiration
Raw Data
	Vehicle					AU (1g/kg)
	Y1	Y2	Y3	Y4	Y5	Y1	Y2	Y3	Y4	Y5
Vehicle	125.417	112.373	118.767	121.74	162.737	132.047	110.357	135.077	141.083	137.78
PQ (20 mg/kg)	109.247	148.6	153.637	154.591	178.378	118.33	124.267	113.913	129.943	156.947
Statistical Analysis
Table Analyzed	Basal Respiration										Compare cell means regardless of rows and columns
Two-way ANOVA	Ordinary										Number of families	1
Alpha	0.05										Number of comparisons per family	6
											Alpha	0.05
Source of Variation	% of total variation	P value	P value summary	Significant?
Interaction	9.315	0.1912	ns	No							Bonferroni's multiple comparisons test	Mean Diff.	95.00% CI of diff.	Significant?	Summary	Adjusted P Value
Row Factor	5.631	0.3043	ns	No
Column Factor	5.057	0.3295	ns	No							Vehicle:Vehicle vs. Vehicle:AU (1g/kg)	-3.062	-39.33 to 33.21	No	ns	>0.9999
											Vehicle:Vehicle vs. PQ (20 mg/kg):Vehicle	-20.68	-56.95 to 15.59	No	ns	0.6332
ANOVA table	SS	DF	MS	F (DFn, DFd)	P value						Vehicle:Vehicle vs. PQ (20 mg/kg):AU (1g/kg)	-0.4733	-36.74 to 35.80	No	ns	>0.9999
Interaction	677	1	677	F (1, 16) = 1.863	P=0.1912						Vehicle:AU (1g/kg) vs. PQ (20 mg/kg):Vehicle	-17.62	-53.89 to 18.65	No	ns	0.9793
Row Factor	409.3	1	409.3	F (1, 16) = 1.126	P=0.3043						Vehicle:AU (1g/kg) vs. PQ (20 mg/kg):AU (1g/kg)	2.589	-33.68 to 38.86	No	ns	>0.9999
Column Factor	367.6	1	367.6	F (1, 16) = 1.012	P=0.3295						PQ (20 mg/kg):Vehicle vs. PQ (20 mg/kg):AU (1g/kg)	20.21	-16.06 to 56.48	No	ns	0.6786
Residual	5814	16	363.4
Difference between column means											Test details	Mean 1	Mean 2	Mean Diff.	SE of diff.	N1	N2	t	DF
Mean of Vehicle	138.5
Mean of AU (1g/kg)	130										Vehicle:Vehicle vs. Vehicle:AU (1g/kg)	128.2	131.3	-3.062	12.06	5	5	0.254	16
Difference between means	8.574										Vehicle:Vehicle vs. PQ (20 mg/kg):Vehicle	128.2	148.9	-20.68	12.06	5	5	1.716	16
SE of difference	8.525										Vehicle:Vehicle vs. PQ (20 mg/kg):AU (1g/kg)	128.2	128.7	-0.4733	12.06	5	5	0.03926	16
95% CI of difference	-9.498 to 26.65										Vehicle:AU (1g/kg) vs. PQ (20 mg/kg):Vehicle	131.3	148.9	-17.62	12.06	5	5	1.462	16
											Vehicle:AU (1g/kg) vs. PQ (20 mg/kg):AU (1g/kg)	131.3	128.7	2.589	12.06	5	5	0.2147	16
Difference between row means											PQ (20 mg/kg):Vehicle vs. PQ (20 mg/kg):AU (1g/kg)	148.9	128.7	20.21	12.06	5	5	1.676	16
Mean of Vehicle	129.7
Mean of PQ (20 mg/kg)	138.8
Difference between means	-9.048
SE of difference	8.525
95% CI of difference	-27.12 to 9.025
Interaction CI
Mean diff, A1 - B1	-3.062
Mean diff, A2 - B2	20.21
(A1 -B1) - (A2 - B2)	-23.27
95% CI of difference	-59.42 to 12.87
(B1 - A1) - (B2 - A2)	23.27
95% CI of difference	-12.87 to 59.42

## Sheet: Maximal Respiration
Raw Data
	Vehicle					AU (1g/kg)
	Y1	Y2	Y3	Y4	Y5	Y1	Y2	Y3	Y4	Y5
Vehicle	301.707	210.05	286.51	270.683	341.777	256.883	239.28	244.557	251.797	246.003
PQ (20 mg/kg)	184.235	218.76	180.463	187.651	227.105	227.51	233.233	232.433	231.907	280.037
Statistical Analysis
Table Analyzed	Maximal Respiration										Compare cell means regardless of rows and columns
Two-way ANOVA	Ordinary										Number of families	1
Alpha	0.05										Number of comparisons per family	6
											Alpha	0.05
Source of Variation	% of total variation	P value	P value summary	Significant?
Interaction	23.6	0.0095	**	Yes							Bonferroni's multiple comparisons test	Mean Diff.	95.00% CI of diff.	Significant?	Summary	Adjusted P Value
Row Factor	32.65	0.0032	**	Yes
Column Factor	0.1977	0.791	ns	No							Vehicle:Vehicle vs. Vehicle:AU (1g/kg)	34.44	-20.34 to 89.22	No	ns	0.4608
											Vehicle:Vehicle vs. PQ (20 mg/kg):Vehicle	82.5	27.72 to 137.3	Yes	**	0.002
ANOVA table	SS	DF	MS	F (DFn, DFd)	P value						Vehicle:Vehicle vs. PQ (20 mg/kg):AU (1g/kg)	41.12	-13.66 to 95.90	No	ns	0.2295
Interaction	7186	1	7186	F (1, 16) = 8.670	P=0.0095						Vehicle:AU (1g/kg) vs. PQ (20 mg/kg):Vehicle	48.06	-6.717 to 102.8	No	ns	0.1071
Row Factor	9942	1	9942	F (1, 16) = 11.99	P=0.0032						Vehicle:AU (1g/kg) vs. PQ (20 mg/kg):AU (1g/kg)	6.68	-48.10 to 61.46	No	ns	>0.9999
Column Factor	60.2	1	60.2	F (1, 16) = 0.07263	P=0.7910						PQ (20 mg/kg):Vehicle vs. PQ (20 mg/kg):AU (1g/kg)	-41.38	-96.16 to 13.40	No	ns	0.2232
Residual	13262	16	828.9
Difference between column means											Test details	Mean 1	Mean 2	Mean Diff.	SE of diff.	N1	N2	t	DF
Mean of Vehicle	240.9
Mean of AU (1g/kg)	244.4										Vehicle:Vehicle vs. Vehicle:AU (1g/kg)	282.1	247.7	34.44	18.21	5	5	1.891	16
Difference between means	-3.47										Vehicle:Vehicle vs. PQ (20 mg/kg):Vehicle	282.1	199.6	82.5	18.21	5	5	4.531	16
SE of difference	12.88										Vehicle:Vehicle vs. PQ (20 mg/kg):AU (1g/kg)	282.1	241	41.12	18.21	5	5	2.258	16
95% CI of difference	-30.76 to 23.83										Vehicle:AU (1g/kg) vs. PQ (20 mg/kg):Vehicle	247.7	199.6	48.06	18.21	5	5	2.639	16
											Vehicle:AU (1g/kg) vs. PQ (20 mg/kg):AU (1g/kg)	247.7	241	6.68	18.21	5	5	0.3669	16
Difference between row means											PQ (20 mg/kg):Vehicle vs. PQ (20 mg/kg):AU (1g/kg)	199.6	241	-41.38	18.21	5	5	2.273	16
Mean of Vehicle	264.9
Mean of PQ (20 mg/kg)	220.3
Difference between means	44.59
SE of difference	12.88
95% CI of difference	17.30 to 71.89
Interaction CI
Mean diff, A1 - B1	34.44
Mean diff, A2 - B2	-41.38
(A1 -B1) - (A2 - B2)	75.82
95% CI of difference	21.23 to 130.4
(B1 - A1) - (B2 - A2)	-75.82
95% CI of difference	-130.4 to -21.23

## Sheet: Proton Leak
Raw Data
	Vehicle					AU (1g/kg)
	Y1	Y2	Y3	Y4	Y5	Y1	Y2	Y3	Y4	Y5
Vehicle	16.5533	18.9233	18.1933	32.96	34.7267	12.0567	10.9167	9.91333	26.9533	25.2833
PQ (20 mg/kg)	71.4417	76.3933	71.87	70.4245	100.322	9.39333	22.5467	17.2967	19.15	9.42667
Statistical Analysis
Table Analyzed	Proton Leak
											Compare cell means regardless of rows and columns
Two-way ANOVA	Ordinary
Alpha	0.05										Number of families	1
											Number of comparisons per family	6
Source of Variation	% of total variation	P value	P value summary	Significant?							Alpha	0.05
Interaction	25.99	<0.0001	****	Yes
Row Factor	23.31	<0.0001	****	Yes							Bonferroni's multiple comparisons test	Mean Diff.	95.00% CI of diff.	Significant?	Summary	Adjusted P Value
Column Factor	41.4	<0.0001	****	Yes
											Vehicle:Vehicle vs. Vehicle:AU (1g/kg)	7.247	-10.35 to 24.84	No	ns	>0.9999
ANOVA table	SS	DF	MS	F (DFn, DFd)	P value						Vehicle:Vehicle vs. PQ (20 mg/kg):Vehicle	-53.82	-71.41 to -36.22	Yes	****	<0.0001
Interaction	3820	1	3820	F (1, 16) = 44.67	P<0.0001						Vehicle:Vehicle vs. PQ (20 mg/kg):AU (1g/kg)	8.709	-8.887 to 26.30	No	ns	0.9357
Row Factor	3427	1	3427	F (1, 16) = 40.07	P<0.0001						Vehicle:AU (1g/kg) vs. PQ (20 mg/kg):Vehicle	-61.07	-78.66 to -43.47	Yes	****	<0.0001
Column Factor	6086	1	6086	F (1, 16) = 71.16	P<0.0001						Vehicle:AU (1g/kg) vs. PQ (20 mg/kg):AU (1g/kg)	1.462	-16.13 to 19.06	No	ns	>0.9999
Residual	1368	16	85.52								PQ (20 mg/kg):Vehicle vs. PQ (20 mg/kg):AU (1g/kg)	62.53	44.93 to 80.12	Yes	****	<0.0001
Difference between column means
Mean of Vehicle	51.18										Test details	Mean 1	Mean 2	Mean Diff.	SE of diff.	N1	N2	t	DF
Mean of AU (1g/kg)	16.29
Difference between means	34.89										Vehicle:Vehicle vs. Vehicle:AU (1g/kg)	24.27	17.02	7.247	5.849	5	5	1.239	16
SE of difference	4.136										Vehicle:Vehicle vs. PQ (20 mg/kg):Vehicle	24.27	78.09	-53.82	5.849	5	5	9.202	16
95% CI of difference	26.12 to 43.65										Vehicle:Vehicle vs. PQ (20 mg/kg):AU (1g/kg)	24.27	15.56	8.709	5.849	5	5	1.489	16
											Vehicle:AU (1g/kg) vs. PQ (20 mg/kg):Vehicle	17.02	78.09	-61.07	5.849	5	5	10.44	16
Difference between row means											Vehicle:AU (1g/kg) vs. PQ (20 mg/kg):AU (1g/kg)	17.02	15.56	1.462	5.849	5	5	0.25	16
Mean of Vehicle	20.65										PQ (20 mg/kg):Vehicle vs. PQ (20 mg/kg):AU (1g/kg)	78.09	15.56	62.53	5.849	5	5	10.69	16
Mean of PQ (20 mg/kg)	46.83
Difference between means	-26.18
SE of difference	4.136
95% CI of difference	-34.95 to -17.41
Interaction CI
Mean diff, A1 - B1	7.247
Mean diff, A2 - B2	62.53
(A1 -B1) - (A2 - B2)	-55.28
95% CI of difference	-72.82 to -37.75
(B1 - A1) - (B2 - A2)	55.28
95% CI of difference	37.75 to 72.82

## Sheet: ATP production
Raw Data
	Vehicle					AU (1g/kg)
	Y1	Y2	Y3	Y4	Y5	Y1	Y2	Y3	Y4	Y5
Vehicle	108.863	93.45	100.573	88.78	128.01	119.99	99.44	125.163	114.13	112.497
PQ (20 mg/kg)	37.805	72.2067	81.7667	84.1667	78.0567	108.937	101.72	96.6167	110.793	147.52
Statistical Analysis
Table Analyzed	ATP production										Compare cell means regardless of rows and columns
Two-way ANOVA	Ordinary										Number of families	1
Alpha	0.05										Number of comparisons per family	6
											Alpha	0.05
Source of Variation	% of total variation	P value	P value summary	Significant?
Interaction	12.09	0.046	*	Yes							Bonferroni's multiple comparisons test	Mean Diff.	95.00% CI of diff.	Significant?	Summary	Adjusted P Value
Row Factor	13.86	0.0342	*	Yes
Column Factor	32.69	0.0026	**	Yes							Vehicle:Vehicle vs. Vehicle:AU (1g/kg)	-10.31	-41.79 to 21.17	No	ns	>0.9999
											Vehicle:Vehicle vs. PQ (20 mg/kg):Vehicle	33.13	1.655 to 64.62	Yes	*	0.0359
ANOVA table	SS	DF	MS	F (DFn, DFd)	P value						Vehicle:Vehicle vs. PQ (20 mg/kg):AU (1g/kg)	-9.182	-40.66 to 22.30	No	ns	>0.9999
Interaction	1281	1	1281	F (1, 16) = 4.678	P=0.0460						Vehicle:AU (1g/kg) vs. PQ (20 mg/kg):Vehicle	43.44	11.96 to 74.92	Yes	**	0.0045
Row Factor	1467	1	1467	F (1, 16) = 5.360	P=0.0342						Vehicle:AU (1g/kg) vs. PQ (20 mg/kg):AU (1g/kg)	1.127	-30.35 to 32.61	No	ns	>0.9999
Column Factor	3462	1	3462	F (1, 16) = 12.65	P=0.0026						PQ (20 mg/kg):Vehicle vs. PQ (20 mg/kg):AU (1g/kg)	-42.32	-73.80 to -10.84	Yes	**	0.0056
Residual	4380	16	273.8
Difference between column means											Test details	Mean 1	Mean 2	Mean Diff.	SE of diff.	N1	N2	t	DF
Mean of Vehicle	87.37
Mean of AU (1g/kg)	113.7										Vehicle:Vehicle vs. Vehicle:AU (1g/kg)	103.9	114.2	-10.31	10.46	5	5	0.9851	16
Difference between means	-26.31										Vehicle:Vehicle vs. PQ (20 mg/kg):Vehicle	103.9	70.8	33.13	10.46	5	5	3.166	16
SE of difference	7.399										Vehicle:Vehicle vs. PQ (20 mg/kg):AU (1g/kg)	103.9	113.1	-9.182	10.46	5	5	0.8775	16
95% CI of difference	-42.00 to -10.63										Vehicle:AU (1g/kg) vs. PQ (20 mg/kg):Vehicle	114.2	70.8	43.44	10.46	5	5	4.152	16
											Vehicle:AU (1g/kg) vs. PQ (20 mg/kg):AU (1g/kg)	114.2	113.1	1.127	10.46	5	5	0.1077	16
Difference between row means											PQ (20 mg/kg):Vehicle vs. PQ (20 mg/kg):AU (1g/kg)	70.8	113.1	-42.32	10.46	5	5	4.044	16
Mean of Vehicle	109.1
Mean of PQ (20 mg/kg)	91.96
Difference between means	17.13
SE of difference	7.399
95% CI of difference	1.445 to 32.82
Interaction CI
Mean diff, A1 - B1	-10.31
Mean diff, A2 - B2	-42.32
(A1 -B1) - (A2 - B2)	32.01
95% CI of difference	0.6362 to 63.38
(B1 - A1) - (B2 - A2)	-32.01
95% CI of difference	-63.38 to -0.6362

## Sheet: Spare Respiratory capacity
Raw Data
	Vehicle					AU (1g/kg)
	Y1	Y2	Y3	Y4	Y5	Y1	Y2	Y3	Y4	Y5
Vehicle	176.29	97.6767	167.743	148.943	179.04	124.837	128.923	109.48	110.713	108.223
PQ (20 mg/kg)	74.9883	70.16	26.8267	33.06	48.7267	109.18	108.967	118.52	101.963	123.09
Statistical Analysis
Table Analyzed	Spare Respiratory capacity										Compare cell means regardless of rows and columns
Two-way ANOVA	Ordinary										Number of families	1
Alpha	0.05										Number of comparisons per family	6
											Alpha	0.05
Source of Variation	% of total variation	P value	P value summary	Significant?
Interaction	35.67	<0.0001	****	Yes							Bonferroni's multiple comparisons test	Mean Diff.	95.00% CI of diff.	Significant?	Summary	Adjusted P Value
Row Factor	41.81	<0.0001	****	Yes
Column Factor	2.108	0.2169	ns	No							Vehicle:Vehicle vs. Vehicle:AU (1g/kg)	37.5	-2.356 to 77.36	No	ns	0.0723
											Vehicle:Vehicle vs. PQ (20 mg/kg):Vehicle	103.2	63.33 to 143.0	Yes	****	<0.0001
ANOVA table	SS	DF	MS	F (DFn, DFd)	P value						Vehicle:Vehicle vs. PQ (20 mg/kg):AU (1g/kg)	41.59	1.735 to 81.45	Yes	*	0.038
Interaction	12275	1	12275	F (1, 16) = 27.97	P<0.0001						Vehicle:AU (1g/kg) vs. PQ (20 mg/kg):Vehicle	65.68	25.82 to 105.5	Yes	***	0.0009
Row Factor	14386	1	14386	F (1, 16) = 32.78	P<0.0001						Vehicle:AU (1g/kg) vs. PQ (20 mg/kg):AU (1g/kg)	4.091	-35.77 to 43.95	No	ns	>0.9999
Column Factor	725.3	1	725.3	F (1, 16) = 1.653	P=0.2169						PQ (20 mg/kg):Vehicle vs. PQ (20 mg/kg):AU (1g/kg)	-61.59	-101.5 to -21.73	Yes	**	0.0016
Residual	7022	16	438.9
Difference between column means											Test details	Mean 1	Mean 2	Mean Diff.	SE of diff.	N1	N2	t	DF
Mean of Vehicle	102.3
Mean of AU (1g/kg)	114.4										Vehicle:Vehicle vs. Vehicle:AU (1g/kg)	153.9	116.4	37.5	13.25	5	5	2.831	16
Difference between means	-12.04										Vehicle:Vehicle vs. PQ (20 mg/kg):Vehicle	153.9	50.75	103.2	13.25	5	5	7.788	16
SE of difference	9.369										Vehicle:Vehicle vs. PQ (20 mg/kg):AU (1g/kg)	153.9	112.3	41.59	13.25	5	5	3.139	16
95% CI of difference	-31.91 to 7.817										Vehicle:AU (1g/kg) vs. PQ (20 mg/kg):Vehicle	116.4	50.75	65.68	13.25	5	5	4.957	16
											Vehicle:AU (1g/kg) vs. PQ (20 mg/kg):AU (1g/kg)	116.4	112.3	4.091	13.25	5	5	0.3088	16
Difference between row means											PQ (20 mg/kg):Vehicle vs. PQ (20 mg/kg):AU (1g/kg)	50.75	112.3	-61.59	13.25	5	5	4.649	16
Mean of Vehicle	135.2
Mean of PQ (20 mg/kg)	81.55
Difference between means	53.64
SE of difference	9.369
95% CI of difference	33.78 to 73.50
Interaction CI
Mean diff, A1 - B1	37.5
Mean diff, A2 - B2	-61.59
(A1 -B1) - (A2 - B2)	99.1
95% CI of difference	59.37 to 138.8
(B1 - A1) - (B2 - A2)	-99.1
95% CI of difference	-138.8 to -59.37

## Sheet: Coupling Efficiency (%)
Raw Data
	Vehicle					AU (1g/kg)
	Y1	Y2	Y3	Y4	Y5	Y1	Y2	Y3	Y4	Y5
Vehicle	86.8013	83.1603	84.6814	72.9259	78.6608	90.8694	90.1078	92.661	80.8955	81.6495
PQ (20 mg/kg)	34.6052	48.5913	53.2208	54.4447	43.7591	92.0617	81.8562	84.8159	85.2628	93.9937
Statistical Analysis
Table Analyzed	Coupling Efficiency (%)
											Compare cell means regardless of rows and columns
Two-way ANOVA	Ordinary
Alpha	0.05										Number of families	1
											Number of comparisons per family	6
Source of Variation	% of total variation	P value	P value summary	Significant?							Alpha	0.05
Interaction	23.95	<0.0001	****	Yes
Row Factor	22.96	<0.0001	****	Yes							Bonferroni's multiple comparisons test	Mean Diff.	95.00% CI of diff.	Significant?	Summary	Adjusted P Value
Column Factor	43.35	<0.0001	****	Yes
											Vehicle:Vehicle vs. Vehicle:AU (1g/kg)	-5.991	-17.76 to 5.779	No	ns	0.8715
ANOVA table	SS	DF	MS	F (DFn, DFd)	P value						Vehicle:Vehicle vs. PQ (20 mg/kg):Vehicle	34.32	22.55 to 46.09	Yes	****	<0.0001
Interaction	1504	1	1504	F (1, 16) = 39.29	P<0.0001						Vehicle:Vehicle vs. PQ (20 mg/kg):AU (1g/kg)	-6.352	-18.12 to 5.418	No	ns	0.744
Row Factor	1442	1	1442	F (1, 16) = 37.67	P<0.0001						Vehicle:AU (1g/kg) vs. PQ (20 mg/kg):Vehicle	40.31	28.54 to 52.08	Yes	****	<0.0001
Column Factor	2722	1	2722	F (1, 16) = 71.13	P<0.0001						Vehicle:AU (1g/kg) vs. PQ (20 mg/kg):AU (1g/kg)	-0.3615	-12.13 to 11.41	No	ns	>0.9999
Residual	612.3	16	38.27								PQ (20 mg/kg):Vehicle vs. PQ (20 mg/kg):AU (1g/kg)	-40.67	-52.44 to -28.90	Yes	****	<0.0001
Difference between column means
Mean of Vehicle	64.09										Test details	Mean 1	Mean 2	Mean Diff.	SE of diff.	N1	N2	t	DF
Mean of AU (1g/kg)	87.42
Difference between means	-23.33										Vehicle:Vehicle vs. Vehicle:AU (1g/kg)	81.25	87.24	-5.991	3.912	5	5	1.531	16
SE of difference	2.766										Vehicle:Vehicle vs. PQ (20 mg/kg):Vehicle	81.25	46.92	34.32	3.912	5	5	8.773	16
95% CI of difference	-29.20 to -17.47										Vehicle:Vehicle vs. PQ (20 mg/kg):AU (1g/kg)	81.25	87.6	-6.352	3.912	5	5	1.624	16
											Vehicle:AU (1g/kg) vs. PQ (20 mg/kg):Vehicle	87.24	46.92	40.31	3.912	5	5	10.3	16
Difference between row means											Vehicle:AU (1g/kg) vs. PQ (20 mg/kg):AU (1g/kg)	87.24	87.6	-0.3615	3.912	5	5	0.09239	16
Mean of Vehicle	84.24										PQ (20 mg/kg):Vehicle vs. PQ (20 mg/kg):AU (1g/kg)	46.92	87.6	-40.67	3.912	5	5	10.4	16
Mean of PQ (20 mg/kg)	67.26
Difference between means	16.98
SE of difference	2.766
95% CI of difference	11.12 to 22.84
Interaction CI
Mean diff, A1 - B1	-5.991
Mean diff, A2 - B2	-40.67
(A1 -B1) - (A2 - B2)	34.68
95% CI of difference	22.95 to 46.41
(B1 - A1) - (B2 - A2)	-34.68
95% CI of difference	-46.41 to -22.95
