# Supplementary material for: Bioactive strawberry fruit (Arbutus unedo L.) extract remedies paraquat-induced neurotoxicity in the offspring prenatally exposed rats
Source: Front Neurosci. 2023 Oct 12;17:1244603. doi: 10.3389/fnins.2023.1244603 (PMC10600521; doi:10.3389/fnins.2023.1244603)
Supplement: Supplementary file 4 [file Data_Sheet_4.xlsx]

## Sheet: Step test
Raw Data
	Vehicle								AU (1g/kg)
	Y1	Y2	Y3	Y4	Y5	Y6	Y7	Y8	Y1	Y2	Y3	Y4	Y5	Y6	Y7	Y8
Vehicle	50.6	52.32	56.24	38.3	62.57	48.62	65.41	55.87	47.69	62.94	48.99	33.87	59.85	60.65	47.22	45.19
PQ (20mg/kg)	28.88	23.77	31.21	37.58	35.13	44.74	20.77	30.53	44.52	47.36	25.33	51.64	46.79	52.36	39.09	57.87
Statistical Analysis
Table Analyzed	Data 1								Compare cell means regardless of rows and columns
Two-way ANOVA	Ordinary								Number of families	1
Alpha	0.05								Number of comparisons per family	6
									Alpha	0.05
Source of Variation	% of total variation	P value	P value summary	Significant?
Interaction	12.57	0.0126	*	Yes					Bonferroni's multiple comparisons test	Mean Diff.	95.00% CI of diff.	Significant?	Summary	Adjusted P Value
Row Factor	32.58	0.0002	***	Yes
Column Factor	5.371	0.0923	ns	No					Vehicle :Vehicle vs. Vehicle :AU (1g/kg)	2.941	-9.844 to 15.73	No	ns	>0.9999
									Vehicle :Vehicle vs. PQ (20mg/kg):Vehicle	22.17	9.380 to 34.95	Yes	***	0.0002
ANOVA table	SS	DF	MS	F (DFn, DFd)	P value				Vehicle :Vehicle vs. PQ (20mg/kg):AU (1g/kg)	8.121	-4.664 to 20.91	No	ns	0.4926
Interaction	577	1	577	F (1, 28) = 7.112	P=0.0126				Vehicle :AU (1g/kg) vs. PQ (20mg/kg):Vehicle	19.22	6.439 to 32.01	Yes	**	0.0012
Row Factor	1495	1	1495	F (1, 28) = 18.44	P=0.0002				Vehicle :AU (1g/kg) vs. PQ (20mg/kg):AU (1g/kg)	5.18	-7.605 to 17.96	No	ns	>0.9999
Column Factor	246.5	1	246.5	F (1, 28) = 3.039	P=0.0923				PQ (20mg/kg):Vehicle vs. PQ (20mg/kg):AU (1g/kg)	-14.04	-26.83 to -1.259	Yes	*	0.0251
Residual	2271	28	81.12
Difference between column means									Test details	Mean 1	Mean 2	Mean Diff.	SE of diff.	N1	N2	t	DF
Mean of Vehicle	42.66
Mean of AU (1g/kg)	48.21								Vehicle :Vehicle vs. Vehicle :AU (1g/kg)	53.74	50.8	2.941	4.503	8	8	0.6531	28
Difference between means	-5.551								Vehicle :Vehicle vs. PQ (20mg/kg):Vehicle	53.74	31.58	22.17	4.503	8	8	4.922	28
SE of difference	3.184								Vehicle :Vehicle vs. PQ (20mg/kg):AU (1g/kg)	53.74	45.62	8.121	4.503	8	8	1.803	28
95% CI of difference	-12.07 to 0.9717								Vehicle :AU (1g/kg) vs. PQ (20mg/kg):Vehicle	50.8	31.58	19.22	4.503	8	8	4.269	28
									Vehicle :AU (1g/kg) vs. PQ (20mg/kg):AU (1g/kg)	50.8	45.62	5.18	4.503	8	8	1.15	28
Difference between row means									PQ (20mg/kg):Vehicle vs. PQ (20mg/kg):AU (1g/kg)	31.58	45.62	-14.04	4.503	8	8	3.118	28
Mean of Vehicle	52.27
Mean of PQ (20mg/kg)	38.6
Difference between means	13.67
SE of difference	3.184
95% CI of difference	7.150 to 20.20
Interaction CI
Mean diff, A1 - B1	2.941
Mean diff, A2 - B2	-14.04
(A1 -B1) - (A2 - B2)	16.99
95% CI of difference	3.939 to 30.03
(B1 - A1) - (B2 - A2)	-16.99
95% CI of difference	-30.03 to -3.939
