# Supplementary material for: Bioactive strawberry fruit (Arbutus unedo L.) extract remedies paraquat-induced neurotoxicity in the offspring prenatally exposed rats
Source: Front Neurosci. 2023 Oct 12;17:1244603. doi: 10.3389/fnins.2023.1244603 (PMC10600521; doi:10.3389/fnins.2023.1244603)
Supplement: Supplementary file 5 [file Data_Sheet_5.xlsx]

## Sheet: cylinder test
Raw Data
	Vehicle								AU (1g/kg)
	Y1	Y2	Y3	Y4	Y5	Y6	Y7	Y8	Y1	Y2	Y3	Y4	Y5	Y6	Y7	Y8
Vehicle	36.93	38.02	28.87	35.24	30.55	30.89	37.02	32.9	35.19	37.44	30.21	36.05	31.87	45.49	32.43	41.62
PQ (20mg/kg)	17.6	22.41	16.22	24.17	19.51	13.09	23.71	19.79	39.96	33.12	29.66	36.24	25.89	30.47	28.02	27.17
Statistical Analysis
Table Analyzed	cylinder test																Compare cell means regardless of rows and columns
Two-way ANOVA	Ordinary																Number of families	1
Alpha	0.05																Number of comparisons per family	6
																	Alpha	0.05
Source of Variation	% of total variation	P value	P value summary	Significant?
Interaction	9.271	0.0057	**	Yes													Tukey's multiple comparisons test	Mean Diff.	95.00% CI of diff.	Significant?	Summary	Adjusted P Value
AU	39.83	<0.0001	****	Yes
PQ	21.88	<0.0001	****	Yes													Vehicle :Vehicle vs. Vehicle :AU (1g/kg)	-2.485	-8.469 to 3.499	No	ns	0.6721
																	Vehicle :Vehicle vs. PQ (20mg/kg):Vehicle	14.24	8.256 to 20.22	Yes	****	<0.0001
ANOVA table	SS	DF	MS	F (DFn, DFd)	P value												Vehicle :Vehicle vs. PQ (20mg/kg):AU (1g/kg)	2.486	-3.497 to 8.470	No	ns	0.6718
Interaction	171.8	1	171.8	F (1, 28) = 8.944	P=0.0057												Vehicle :AU (1g/kg) vs. PQ (20mg/kg):Vehicle	16.73	10.74 to 22.71	Yes	****	<0.0001
AU	738.1	1	738.1	F (1, 28) = 38.42	P<0.0001												Vehicle :AU (1g/kg) vs. PQ (20mg/kg):AU (1g/kg)	4.971	-1.012 to 10.95	No	ns	0.1299
PQ	405.5	1	405.5	F (1, 28) = 21.11	P<0.0001												PQ (20mg/kg):Vehicle vs. PQ (20mg/kg):AU (1g/kg)	-11.75	-17.74 to -5.770	Yes	****	<0.0001
Residual	537.9	28	19.21
Difference between column means																	Test details	Mean 1	Mean 2	Mean Diff.	SE of diff.	N1	N2	q	DF
Mean of Vehicle	26.68
Mean of AU (1g/kg)	33.8																Vehicle :Vehicle vs. Vehicle :AU (1g/kg)	33.8	36.29	-2.485	2.192	8	8	1.604	28
Difference between means	-7.119																Vehicle :Vehicle vs. PQ (20mg/kg):Vehicle	33.8	19.56	14.24	2.192	8	8	9.189	28
SE of difference	1.55																Vehicle :Vehicle vs. PQ (20mg/kg):AU (1g/kg)	33.8	31.32	2.486	2.192	8	8	1.604	28
95% CI of difference	-10.29 to -3.945																Vehicle :AU (1g/kg) vs. PQ (20mg/kg):Vehicle	36.29	19.56	16.73	2.192	8	8	10.79	28
																	Vehicle :AU (1g/kg) vs. PQ (20mg/kg):AU (1g/kg)	36.29	31.32	4.971	2.192	8	8	3.208	28
Difference between row means																	PQ (20mg/kg):Vehicle vs. PQ (20mg/kg):AU (1g/kg)	19.56	31.32	-11.75	2.192	8	8	7.585	28
Mean of Vehicle	35.05
Mean of PQ (20mg/kg)	25.44
Difference between means	9.606
SE of difference	1.55
95% CI of difference	6.431 to 12.78
Interaction CI
Mean diff, A1 - B1	-2.485
Mean diff, A2 - B2	-11.75
(A1 -B1) - (A2 - B2)	9.269
95% CI of difference	2.920 to 15.62
(B1 - A1) - (B2 - A2)	-9.269
95% CI of difference	-15.62 to -2.920
