# Supplementary material for: Bioactive strawberry fruit (Arbutus unedo L.) extract remedies paraquat-induced neurotoxicity in the offspring prenatally exposed rats
Source: Front Neurosci. 2023 Oct 12;17:1244603. doi: 10.3389/fnins.2023.1244603 (PMC10600521; doi:10.3389/fnins.2023.1244603)
Supplement: Supplementary file 6 [file Data_Sheet_6.xlsx]

## Sheet: Dopamine
Raw Data
	Vehicle								AU (1g/kg)
	Y1	Y2	Y3	Y4	Y5	Y6	Y7	Y8	Y1	Y2	Y3	Y4	Y5	Y6	Y7	Y8
Vehicle	0.234177	0.228916	0.409055	0.18283	0.30362	0.209607	0.250772	0.230483	0.313129	0.206731	0.386441	0.189873	0.221344	0.330769	0.238636	0.243446
PQ (20mg/kg)	0.174255	0.258333	0.164151	0.165556	0.138696	0.18	0.201709	0.104	0.221154	0.332874	0.267241	0.175862	0.149593	0.346457	0.286154	0.250318
Statistical Analysis
Table Analyzed	Dopamine
																	Compare cell means regardless of rows and columns
Two-way ANOVA	Ordinary
Alpha	0.05																Number of families	1
																	Number of comparisons per family	6
Source of Variation	% of total variation	P value	P value summary	Significant?													Alpha	0.05
Interaction	0.4356	0.4075	ns	No
	77.27	<0.0001	****	Yes													Bonferroni's multiple comparisons test	Mean Diff.	95.00% CI of diff.	Significant?	Summary	Adjusted P Value
	5.043	0.0079	**	Yes
																	Vehicle :Vehicle vs. Vehicle :AU (1g/kg)	-0.2163	-0.6459 to 0.2134	No	ns	0.9849
ANOVA table	SS	DF	MS	F (DFn, DFd)	P value												Vehicle :Vehicle vs. PQ (20mg/kg):Vehicle	1.289	0.8591 to 1.718	Yes	****	<0.0001
Interaction	0.0648	1	0.0648	F (1, 28) = 0.7071	P=0.4075												Vehicle :Vehicle vs. PQ (20mg/kg):AU (1g/kg)	0.8925	0.4628 to 1.322	Yes	****	<0.0001
	11.5	1	11.5	F (1, 28) = 125.4	P<0.0001												Vehicle :AU (1g/kg) vs. PQ (20mg/kg):Vehicle	1.505	1.075 to 1.935	Yes	****	<0.0001
	0.7503	1	0.7503	F (1, 28) = 8.188	P=0.0079												Vehicle :AU (1g/kg) vs. PQ (20mg/kg):AU (1g/kg)	1.109	0.6791 to 1.538	Yes	****	<0.0001
Residual	2.566	28	0.09164														PQ (20mg/kg):Vehicle vs. PQ (20mg/kg):AU (1g/kg)	-0.3963	-0.8259 to 0.03345	No	ns	0.0847
Difference between column means
Mean of Vehicle	1.499																Test details	Mean 1	Mean 2	Mean Diff.	SE of diff.	N1	N2	t	DF
Mean of AU (1g/kg)	1.806
Difference between means	-0.3063																Vehicle :Vehicle vs. Vehicle :AU (1g/kg)	2.144	2.36	-0.2163	0.1514	8	8	1.429	28
SE of difference	0.107																Vehicle :Vehicle vs. PQ (20mg/kg):Vehicle	2.144	0.855	1.289	0.1514	8	8	8.515	28
95% CI of difference	-0.5255 to -0.08701																Vehicle :Vehicle vs. PQ (20mg/kg):AU (1g/kg)	2.144	1.251	0.8925	0.1514	8	8	5.897	28
																	Vehicle :AU (1g/kg) vs. PQ (20mg/kg):Vehicle	2.36	0.855	1.505	0.1514	8	8	9.943	28
Difference between row means																	Vehicle :AU (1g/kg) vs. PQ (20mg/kg):AU (1g/kg)	2.36	1.251	1.109	0.1514	8	8	7.325	28
Mean of Vehicle	2.252																PQ (20mg/kg):Vehicle vs. PQ (20mg/kg):AU (1g/kg)	0.855	1.251	-0.3963	0.1514	8	8	2.618	28
Mean of PQ (20mg/kg)	1.053
Difference between means	1.199
SE of difference	0.107
95% CI of difference	0.9795 to 1.418
Interaction CI
Mean diff, A1 - B1	-0.2163
Mean diff, A2 - B2	-0.3963
(A1 -B1) - (A2 - B2)	0.18
95% CI of difference	-0.2585 to 0.6185
(B1 - A1) - (B2 - A2)	-0.18
95% CI of difference	-0.6185 to 0.2585

## Sheet: DOPAC
Raw Data
	Vehicle								AU (1g/kg)
	Y1	Y2	Y3	Y4	Y5	Y6	Y7	Y8	Y1	Y2	Y3	Y4	Y5	Y6	Y7	Y8
Vehicle	0.43	0.62	0.38	0.48	0.37	0.38	0.52	0.45	0.43	0.6	0.56	0.63	0.38	0.44	0.45	0.65
PQ (20mg/kg)	0.48	0.23	0.33	0.22	0.23	0.35	0.22	0.19	0.44	0.47	0.43	0.28	0.31	0.55	0.32	0.45
Statistical Analysis
Table Analyzed	DOPAC																Compare cell means regardless of rows and columns
Two-way ANOVA	Ordinary																Number of families	1
Alpha	0.05																Number of comparisons per family	6
																	Alpha	0.05
Source of Variation	% of total variation	P value	P value summary	Significant?
Interaction	1.514	0.3725	ns	No													Bonferroni's multiple comparisons test	Mean Diff.	95.00% CI of diff.	Significant?	Summary	Adjusted P Value
Row Factor	32.49	0.0002	***	Yes
Column Factor	14.38	0.0093	**	Yes													Vehicle:Vehicle vs. Vehicle:AU (1g/kg)	-0.06375	-0.1994 to 0.07193	No	ns	>0.9999
																	Vehicle:Vehicle vs. PQ (20mg/kg):Vehicle	0.1725	0.03682 to 0.3082	Yes	**	0.0071
ANOVA table	SS	DF	MS	F (DFn, DFd)	P value												Vehicle:Vehicle vs. PQ (20mg/kg):AU (1g/kg)	0.0475	-0.08818 to 0.1832	No	ns	>0.9999
Interaction	0.007503	1	0.007503	F (1, 28) = 0.8213	P=0.3725												Vehicle:AU (1g/kg) vs. PQ (20mg/kg):Vehicle	0.2363	0.1006 to 0.3719	Yes	***	0.0002
Row Factor	0.161	1	0.161	F (1, 28) = 17.63	P=0.0002												Vehicle:AU (1g/kg) vs. PQ (20mg/kg):AU (1g/kg)	0.1113	-0.02443 to 0.2469	No	ns	0.1642
Column Factor	0.07125	1	0.07125	F (1, 28) = 7.799	P=0.0093												PQ (20mg/kg):Vehicle vs. PQ (20mg/kg):AU (1g/kg)	-0.125	-0.2607 to 0.01068	No	ns	0.0851
Residual	0.2558	28	0.009136
Difference between column means																	Test details	Mean 1	Mean 2	Mean Diff.	SE of diff.	N1	N2	t	DF
Mean of Vehicle	0.3675
Mean of AU (1g/kg)	0.4619																Vehicle:Vehicle vs. Vehicle:AU (1g/kg)	0.4538	0.5175	-0.06375	0.04779	8	8	1.334	28
Difference between means	-0.09438																Vehicle:Vehicle vs. PQ (20mg/kg):Vehicle	0.4538	0.2813	0.1725	0.04779	8	8	3.609	28
SE of difference	0.03379																Vehicle:Vehicle vs. PQ (20mg/kg):AU (1g/kg)	0.4538	0.4063	0.0475	0.04779	8	8	0.9939	28
95% CI of difference	-0.1636 to -0.02515																Vehicle:AU (1g/kg) vs. PQ (20mg/kg):Vehicle	0.5175	0.2813	0.2363	0.04779	8	8	4.943	28
																	Vehicle:AU (1g/kg) vs. PQ (20mg/kg):AU (1g/kg)	0.5175	0.4063	0.1113	0.04779	8	8	2.328	28
Difference between row means																	PQ (20mg/kg):Vehicle vs. PQ (20mg/kg):AU (1g/kg)	0.2813	0.4063	-0.125	0.04779	8	8	2.616	28
Mean of Vehicle	0.4856
Mean of PQ (20mg/kg)	0.3438
Difference between means	0.1419
SE of difference	0.03379
95% CI of difference	0.07265 to 0.2111
Interaction CI
Mean diff, A1 - B1	-0.06375
Mean diff, A2 - B2	-0.125
(A1 -B1) - (A2 - B2)	0.06125
95% CI of difference	-0.07720 to 0.1997
(B1 - A1) - (B2 - A2)	-0.06125
95% CI of difference	-0.1997 to 0.07720

## Sheet: TO
Raw Data
	Vehicle								AU (1g/kg)
	Y1	Y2	Y3	Y4	Y5	Y6	Y7	Y8	Y1	Y2	Y3	Y4	Y5	Y6	Y7	Y8
Vehicle	0.234177	0.228916	0.409055	0.18283	0.30362	0.209607	0.250772	0.230483	0.313129	0.206731	0.386441	0.189873	0.221344	0.330769	0.238636	0.243446
PQ (20mg/kg)	0.174255	0.258333	0.164151	0.165556	0.138696	0.18	0.201709	0.104	0.221154	0.332874	0.267241	0.175862	0.149593	0.346457	0.286154	0.250318
Statistical Analysis
Table Analyzed	TO																Compare cell means regardless of rows and columns
Two-way ANOVA	Ordinary																Number of families	1
Alpha	0.05																Number of comparisons per family	6
																	Alpha	0.05
Source of Variation	% of total variation	P value	P value summary	Significant?
Interaction	6.119	0.1353	ns	No													Tukey's multiple comparisons test	Mean Diff.	95.00% CI of diff.	Significant?	Summary	Adjusted P Value
PQ	11.29	0.0459	*	Yes
AU	10.15	0.0575	ns	No													Vehicle :Vehicle vs. Vehicle :AU (1g/kg)	-0.01011	-0.09831 to 0.07808	No	ns	0.9891
																	Vehicle :Vehicle vs. PQ (20mg/kg):Vehicle	0.08284	-0.005353 to 0.1710	No	ns	0.0715
ANOVA table	SS	DF	MS	F (DFn, DFd)	P value												Vehicle :Vehicle vs. PQ (20mg/kg):AU (1g/kg)	0.002476	-0.08572 to 0.09067	No	ns	0.9998
Interaction	0.009872	1	0.009872	F (1, 28) = 2.365	P=0.1353												Vehicle :AU (1g/kg) vs. PQ (20mg/kg):Vehicle	0.09296	0.004761 to 0.1812	Yes	*	0.036
PQ	0.01822	1	0.01822	F (1, 28) = 4.364	P=0.0459												Vehicle :AU (1g/kg) vs. PQ (20mg/kg):AU (1g/kg)	0.01259	-0.07561 to 0.1008	No	ns	0.9795
AU	0.01637	1	0.01637	F (1, 28) = 3.923	P=0.0575												PQ (20mg/kg):Vehicle vs. PQ (20mg/kg):AU (1g/kg)	-0.08037	-0.1686 to 0.007829	No	ns	0.0839
Residual	0.1169	28	0.004174
Difference between column means																	Test details	Mean 1	Mean 2	Mean Diff.	SE of diff.	N1	N2	q	DF
Mean of Vehicle	0.2148
Mean of AU (1g/kg)	0.26																Vehicle :Vehicle vs. Vehicle :AU (1g/kg)	0.2562	0.2663	-0.01011	0.0323	8	8	0.4428	28
Difference between means	-0.04524																Vehicle :Vehicle vs. PQ (20mg/kg):Vehicle	0.2562	0.1733	0.08284	0.0323	8	8	3.627	28
SE of difference	0.02284																Vehicle :Vehicle vs. PQ (20mg/kg):AU (1g/kg)	0.2562	0.2537	0.002476	0.0323	8	8	0.1084	28
95% CI of difference	-0.09203 to 0.001548																Vehicle :AU (1g/kg) vs. PQ (20mg/kg):Vehicle	0.2663	0.1733	0.09296	0.0323	8	8	4.07	28
																	Vehicle :AU (1g/kg) vs. PQ (20mg/kg):AU (1g/kg)	0.2663	0.2537	0.01259	0.0323	8	8	0.5512	28
Difference between row means																	PQ (20mg/kg):Vehicle vs. PQ (20mg/kg):AU (1g/kg)	0.1733	0.2537	-0.08037	0.0323	8	8	3.518	28
Mean of Vehicle	0.2612
Mean of PQ (20mg/kg)	0.2135
Difference between means	0.04772
SE of difference	0.02284
95% CI of difference	0.0009277 to 0.09451
Interaction CI
Mean diff, A1 - B1	-0.01011
Mean diff, A2 - B2	-0.08037
(A1 -B1) - (A2 - B2)	0.07026
95% CI of difference	-0.02332 to 0.1638
(B1 - A1) - (B2 - A2)	-0.07026
95% CI of difference	-0.1638 to 0.02332
