# Supplementary material for: Bioactive strawberry fruit (Arbutus unedo L.) extract remedies paraquat-induced neurotoxicity in the offspring prenatally exposed rats
Source: Front Neurosci. 2023 Oct 12;17:1244603. doi: 10.3389/fnins.2023.1244603 (PMC10600521; doi:10.3389/fnins.2023.1244603)
Supplement: Supplementary file 7 [file Data_Sheet_7.xlsx]

## Sheet: Iron
Raw Data
	Vehicle								AU (1g/kg)
	Y1	Y2	Y3	Y4	Y5	Y6	Y7	Y8	Y1	Y2	Y3	Y4	Y5	Y6	Y7	Y8
Vehicle	3.01	4.4	3.41	3.68	3.82	3.76	4.73	3.35	3.28	3.64	3.89	3.78	3.17	3.81	3.76	3.98
PQ (20mg/kg)	5.61	6.49	6.23	5.66	6.31	4.86	6.01	6.71	4.86	3.09	5.23	4.4	4.1	4.76	3.92	5.69
Statistical Analysis
Table Analyzed	IRON																Compare cell means regardless of rows and columns
Two-way ANOVA	Ordinary																Number of families	1
Alpha	0.05																Number of comparisons per family	6
																	Alpha	0.05
Source of Variation	% of total variation	P value	P value summary	Significant?
Interaction	10.08	0.0029	**	Yes													Bonferroni's multiple comparisons test	Mean Diff.	95.00% CI of diff.	Significant?	Summary	Adjusted P Value
Row Factor	50.01	<0.0001	****	Yes
Column Factor	13.44	0.0008	***	Yes													Vehicle :Vehicle vs. Vehicle :AU (1g/kg)	0.1063	-0.7377 to 0.9502	No	ns	>0.9999
																	Vehicle :Vehicle vs. PQ (20mg/kg):Vehicle	-2.215	-3.059 to -1.371	Yes	****	<0.0001
ANOVA table	SS	DF	MS	F (DFn, DFd)	P value												Vehicle :Vehicle vs. PQ (20mg/kg):AU (1g/kg)	-0.7363	-1.580 to 0.1077	No	ns	0.1175
Interaction	3.768	1	3.768	F (1, 28) = 10.66	P=0.0029												Vehicle :AU (1g/kg) vs. PQ (20mg/kg):Vehicle	-2.321	-3.165 to -1.477	Yes	****	<0.0001
Row Factor	18.7	1	18.7	F (1, 28) = 52.88	P<0.0001												Vehicle :AU (1g/kg) vs. PQ (20mg/kg):AU (1g/kg)	-0.8425	-1.686 to 0.001498	No	ns	0.0506
Column Factor	5.024	1	5.024	F (1, 28) = 14.21	P=0.0008												PQ (20mg/kg):Vehicle vs. PQ (20mg/kg):AU (1g/kg)	1.479	0.6348 to 2.323	Yes	***	0.0002
Residual	9.899	28	0.3535
Difference between column means																	Test details	Mean 1	Mean 2	Mean Diff.	SE of diff.	N1	N2	t	DF
Mean of Vehicle	4.878
Mean of AU (1g/kg)	4.085																Vehicle :Vehicle vs. Vehicle :AU (1g/kg)	3.77	3.664	0.1063	0.2973	8	8	0.3574	28
Difference between means	0.7925																Vehicle :Vehicle vs. PQ (20mg/kg):Vehicle	3.77	5.985	-2.215	0.2973	8	8	7.451	28
SE of difference	0.2102																Vehicle :Vehicle vs. PQ (20mg/kg):AU (1g/kg)	3.77	4.506	-0.7363	0.2973	8	8	2.477	28
95% CI of difference	0.3619 to 1.223																Vehicle :AU (1g/kg) vs. PQ (20mg/kg):Vehicle	3.664	5.985	-2.321	0.2973	8	8	7.808	28
																	Vehicle :AU (1g/kg) vs. PQ (20mg/kg):AU (1g/kg)	3.664	4.506	-0.8425	0.2973	8	8	2.834	28
Difference between row means																	PQ (20mg/kg):Vehicle vs. PQ (20mg/kg):AU (1g/kg)	5.985	4.506	1.479	0.2973	8	8	4.974	28
Mean of Vehicle	3.717
Mean of PQ (20mg/kg)	5.246
Difference between means	-1.529
SE of difference	0.2102
95% CI of difference	-1.959 to -1.098
Interaction CI
Mean diff, A1 - B1	0.1063
Mean diff, A2 - B2	1.479
(A1 -B1) - (A2 - B2)	-1.373
95% CI of difference	-2.234 to -0.5113
(B1 - A1) - (B2 - A2)	1.373
95% CI of difference	0.5113 to 2.234

## Sheet: Zinc
Raw Data
	Vehicle								AU (1g/kg)
	Y1	Y2	Y3	Y4	Y5	Y6	Y7	Y8	Y1	Y2	Y3	Y4	Y5	Y6	Y7	Y8
Vehicle	4.78	3.57	4.59	5.05	5.01	3.69	5.26	4.62	5.28	4.87	6.06	4.54	6.07	5.19	5.06	5.07
PQ (20mg/kg)	2.96	3.03	2.92	4.26	4.23	3.76	4.97	5.41	5.29	4.85	5.42	6.05	5.17	5.04	5.71	4.1
Statistical Analysis
Table Analyzed	Zinc
																	Compare cell means regardless of rows and columns
Two-way ANOVA	Ordinary
Alpha	0.05																Number of families	1
																	Number of comparisons per family	6
Source of Variation	% of total variation	P value	P value summary	Significant?													Alpha	0.05
Interaction	2.813	0.2585	ns	No
Row Factor	4.226	0.1685	ns	No													Bonferroni's multiple comparisons test	Mean Diff.	95.00% CI of diff.	Significant?	Summary	Adjusted P Value
Column Factor	33.76	0.0004	***	Yes
																	Vehicle :Vehicle vs. Vehicle :AU (1g/kg)	-0.6962	-1.680 to 0.2871	No	ns	0.3248
ANOVA table	SS	DF	MS	F (DFn, DFd)	P value												Vehicle :Vehicle vs. PQ (20mg/kg):Vehicle	0.6288	-0.3546 to 1.612	No	ns	0.4812
Interaction	0.6385	1	0.6385	F (1, 28) = 1.330	P=0.2585												Vehicle :Vehicle vs. PQ (20mg/kg):AU (1g/kg)	-0.6325	-1.616 to 0.3508	No	ns	0.4711
Row Factor	0.9591	1	0.9591	F (1, 28) = 1.999	P=0.1685												Vehicle :AU (1g/kg) vs. PQ (20mg/kg):Vehicle	1.325	0.3417 to 2.308	Yes	**	0.004
Column Factor	7.664	1	7.664	F (1, 28) = 15.97	P=0.0004												Vehicle :AU (1g/kg) vs. PQ (20mg/kg):AU (1g/kg)	0.06375	-0.9196 to 1.047	No	ns	>0.9999
Residual	13.44	28	0.4799														PQ (20mg/kg):Vehicle vs. PQ (20mg/kg):AU (1g/kg)	-1.261	-2.245 to -0.2779	Yes	**	0.0065
Difference between column means
Mean of Vehicle	4.257																Test details	Mean 1	Mean 2	Mean Diff.	SE of diff.	N1	N2	t	DF
Mean of AU (1g/kg)	5.236
Difference between means	-0.9788																Vehicle :Vehicle vs. Vehicle :AU (1g/kg)	4.571	5.268	-0.6962	0.3464	8	8	2.01	28
SE of difference	0.2449																Vehicle :Vehicle vs. PQ (20mg/kg):Vehicle	4.571	3.943	0.6288	0.3464	8	8	1.815	28
95% CI of difference	-1.480 to -0.4771																Vehicle :Vehicle vs. PQ (20mg/kg):AU (1g/kg)	4.571	5.204	-0.6325	0.3464	8	8	1.826	28
																	Vehicle :AU (1g/kg) vs. PQ (20mg/kg):Vehicle	5.268	3.943	1.325	0.3464	8	8	3.825	28
Difference between row means																	Vehicle :AU (1g/kg) vs. PQ (20mg/kg):AU (1g/kg)	5.268	5.204	0.06375	0.3464	8	8	0.1841	28
Mean of Vehicle	4.919																PQ (20mg/kg):Vehicle vs. PQ (20mg/kg):AU (1g/kg)	3.943	5.204	-1.261	0.3464	8	8	3.641	28
Mean of PQ (20mg/kg)	4.573
Difference between means	0.3463
SE of difference	0.2449
95% CI of difference	-0.1554 to 0.8479
Interaction CI
Mean diff, A1 - B1	-0.6963
Mean diff, A2 - B2	-1.261
(A1 -B1) - (A2 - B2)	0.565
95% CI of difference	-0.4384 to 1.568
(B1 - A1) - (B2 - A2)	-0.565
95% CI of difference	-1.568 to 0.4384

## Sheet: Copper
Raw Data
	Vehicle								AU (1g/kg)
	Y1	Y2	Y3	Y4	Y5	Y6	Y7	Y8	Y1	Y2	Y3	Y4	Y5	Y6	Y7	Y8
Vehicle	0.93	0.77	0.84	1.08	0.97	0.77	0.68	0.82	1.12	1.06	0.99	1.52	1.53	0.92	0.8	1.15
PQ (20mg/kg)	1.28	1.31	1.17	1.42	1.07	1.3	1.42	1.17	1.19	0.88	1.48	1.68	1.36	1.29	1.09	1.28
Statistical Analysis
Table Analyzed	Copper
Two-way ANOVA	Ordinary																Compare cell means regardless of rows and columns
Alpha	0.05
																	Number of families	1
Source of Variation	% of total variation	P value	P value summary	Significant?													Number of comparisons per family	6
Interaction	6.846	0.0719	ns	No													Alpha	0.05
Row Factor	30.03	0.0005	***	Yes
Column Factor	8.34	0.0483	*	Yes													Bonferroni's multiple comparisons test	Mean Diff.	95.00% CI of diff.	Significant?	Summary	Adjusted P Value
ANOVA table	SS	DF	MS	F (DFn, DFd)	P value												Vehicle :Vehicle vs. Vehicle :AU (1g/kg)	-0.2788	-0.5631 to 0.005647	No	ns	0.0573
Interaction	0.1405	1	0.1405	F (1, 28) = 3.499	P=0.0719												Vehicle :Vehicle vs. PQ (20mg/kg):Vehicle	-0.41	-0.6944 to -0.1256	Yes	**	0.002
Row Factor	0.6161	1	0.6161	F (1, 28) = 15.35	P=0.0005												Vehicle :Vehicle vs. PQ (20mg/kg):AU (1g/kg)	-0.4238	-0.7081 to -0.1394	Yes	**	0.0014
Column Factor	0.1711	1	0.1711	F (1, 28) = 4.263	P=0.0483												Vehicle :AU (1g/kg) vs. PQ (20mg/kg):Vehicle	-0.1313	-0.4156 to 0.1531	No	ns	>0.9999
Residual	1.124	28	0.04014														Vehicle :AU (1g/kg) vs. PQ (20mg/kg):AU (1g/kg)	-0.145	-0.4294 to 0.1394	No	ns	0.9533
																	PQ (20mg/kg):Vehicle vs. PQ (20mg/kg):AU (1g/kg)	-0.01375	-0.2981 to 0.2706	No	ns	>0.9999
Difference between column means
Mean of Vehicle	1.063
Mean of AU (1g/kg)	1.209																Test details	Mean 1	Mean 2	Mean Diff.	SE of diff.	N1	N2	t	DF
Difference between means	-0.1463
SE of difference	0.07084																Vehicle :Vehicle vs. Vehicle :AU (1g/kg)	0.8575	1.136	-0.2788	0.1002	8	8	2.783	28
95% CI of difference	-0.2914 to -0.001149																Vehicle :Vehicle vs. PQ (20mg/kg):Vehicle	0.8575	1.268	-0.41	0.1002	8	8	4.093	28
																	Vehicle :Vehicle vs. PQ (20mg/kg):AU (1g/kg)	0.8575	1.281	-0.4238	0.1002	8	8	4.23	28
Difference between row means																	Vehicle :AU (1g/kg) vs. PQ (20mg/kg):Vehicle	1.136	1.268	-0.1313	0.1002	8	8	1.31	28
Mean of Vehicle	0.9969																Vehicle :AU (1g/kg) vs. PQ (20mg/kg):AU (1g/kg)	1.136	1.281	-0.145	0.1002	8	8	1.447	28
Mean of PQ (20mg/kg)	1.274																PQ (20mg/kg):Vehicle vs. PQ (20mg/kg):AU (1g/kg)	1.268	1.281	-0.01375	0.1002	8	8	0.1373	28
Difference between means	-0.2775
SE of difference	0.07084
95% CI of difference	-0.4226 to -0.1324
Interaction CI
Mean diff, A1 - B1	-0.2788
Mean diff, A2 - B2	-0.01375
(A1 -B1) - (A2 - B2)	-0.265
95% CI of difference	-0.5552 to 0.02520
(B1 - A1) - (B2 - A2)	0.265
95% CI of difference	-0.02520 to 0.5552

## Sheet: Manganese
Raw Data
	Vehicle								AU (1g/kg)
	Y1	Y2	Y3	Y4	Y5	Y6	Y7	Y8	Y1	Y2	Y3	Y4	Y5	Y6	Y7	Y8
Vehicle	0.22	0.17	0.15	0.13	0.14	0.18	0.15	0.23	0.21	0.23	0.22	0.17	0.25	0.15	0.14	0.18
PQ (20mg/kg)	0.17	0.18	0.21	0.21	0.21	0.25	0.14	0.08	0.26	0.17	0.24	0.21	0.07	0.2	0.12	0.14
Statistical Analysis
Table Analyzed	Manganese
Two-way ANOVA	Ordinary																Compare cell means regardless of rows and columns
Alpha	0.05
																	Number of families	1
Source of Variation	% of total variation	P value	P value summary	Significant?													Number of comparisons per family	6
Interaction	2.143	0.4378	ns	No													Alpha	0.05
PQ	0.1594	0.8316	ns	No
AU	0.8677	0.6203	ns	No													Bonferroni's multiple comparisons test	Mean Diff.	95.00% CI of diff.	Significant?	Summary	Adjusted P Value
ANOVA table	SS	DF	MS	F (DFn, DFd)	P value												Vehicle :Vehicle vs. Vehicle :AU (1g/kg)	-0.0225	-0.09263 to 0.04763	No	ns	>0.9999
Interaction	0.001513	1	0.001513	F (1, 28) = 0.6196	P=0.4378												Vehicle :Vehicle vs. PQ (20mg/kg):Vehicle	-0.01	-0.08013 to 0.06013	No	ns	>0.9999
PQ	0.0001125	1	0.0001125	F (1, 28) = 0.04609	P=0.8316												Vehicle :Vehicle vs. PQ (20mg/kg):AU (1g/kg)	-0.005	-0.07513 to 0.06513	No	ns	>0.9999
AU	0.0006125	1	0.0006125	F (1, 28) = 0.2509	P=0.6203												Vehicle :AU (1g/kg) vs. PQ (20mg/kg):Vehicle	0.0125	-0.05763 to 0.08263	No	ns	>0.9999
Residual	0.06835	28	0.002441														Vehicle :AU (1g/kg) vs. PQ (20mg/kg):AU (1g/kg)	0.0175	-0.05263 to 0.08763	No	ns	>0.9999
																	PQ (20mg/kg):Vehicle vs. PQ (20mg/kg):AU (1g/kg)	0.005	-0.06513 to 0.07513	No	ns	>0.9999
Difference between column means
Mean of Vehicle	0.1763
Mean of AU (1g/kg)	0.185																Test details	Mean 1	Mean 2	Mean Diff.	SE of diff.	N1	N2	t	DF
Difference between means	-0.00875
SE of difference	0.01747																Vehicle :Vehicle vs. Vehicle :AU (1g/kg)	0.1713	0.1938	-0.0225	0.0247	8	8	0.9108	28
95% CI of difference	-0.04453 to 0.02703																Vehicle :Vehicle vs. PQ (20mg/kg):Vehicle	0.1713	0.1813	-0.01	0.0247	8	8	0.4048	28
																	Vehicle :Vehicle vs. PQ (20mg/kg):AU (1g/kg)	0.1713	0.1763	-0.005	0.0247	8	8	0.2024	28
Difference between row means																	Vehicle :AU (1g/kg) vs. PQ (20mg/kg):Vehicle	0.1938	0.1813	0.0125	0.0247	8	8	0.506	28
Mean of Vehicle	0.1825																Vehicle :AU (1g/kg) vs. PQ (20mg/kg):AU (1g/kg)	0.1938	0.1763	0.0175	0.0247	8	8	0.7084	28
Mean of PQ (20mg/kg)	0.1788																PQ (20mg/kg):Vehicle vs. PQ (20mg/kg):AU (1g/kg)	0.1813	0.1763	0.005	0.0247	8	8	0.2024	28
Difference between means	0.00375
SE of difference	0.01747
95% CI of difference	-0.03203 to 0.03953
Interaction CI
Mean diff, A1 - B1	-0.0225
Mean diff, A2 - B2	0.005
(A1 -B1) - (A2 - B2)	-0.0275
95% CI of difference	-0.09906 to 0.04406
(B1 - A1) - (B2 - A2)	0.0275
95% CI of difference	-0.04406 to 0.09906
