# Supplementary material for: Bioactive strawberry fruit (Arbutus unedo L.) extract remedies paraquat-induced neurotoxicity in the offspring prenatally exposed rats
Source: Front Neurosci. 2023 Oct 12;17:1244603. doi: 10.3389/fnins.2023.1244603 (PMC10600521; doi:10.3389/fnins.2023.1244603)
Supplement: Supplementary file 8 [file Data_Sheet_8.xlsx]

## Sheet: Feuil1
Raw Data
	Vehicle								AU (1g/kg)
	Y1	Y2	Y3	Y4	Y5	Y6	Y7	Y8	Y1	Y2	Y3	Y4	Y5	Y6	Y7	Y8
Vehicle	276.17	185.35	180.94	221.93	178.99	256.96	170.91	181.58	237.74	177.3	246.26	274.98	289.08	254.7	295.8	288.47
PQ (20mg/kg)	78.47	87.07	96.82	125.78	86.68	98.44	121.04	88.8	182.7	225.73	187.49	195.83	187.17	215.92	275.7	194.26
Raw Data
Table Analyzed	Total anti-oxydant capacity																Compare cell means regardless of rows and columns
Two-way ANOVA	Ordinary																Number of families	1
Alpha	0.05																Number of comparisons per family	6
																	Alpha	0.05
Source of Variation	% of total variation	P value	P value summary	Significant?
Interaction	4.921	0.0184	*	Yes													Bonferroni's multiple comparisons test	Mean Diff.	95.00% CI of diff.	Significant?	Summary	Adjusted P Value
PQ	35.86	<0.0001	****	Yes
AU	37.23	<0.0001	****	Yes													Vehicle:Vehicle vs. Vehicle:AU (1g/kg)	-51.44	-98.57 to -4.301	Yes	*	0.0264
																	Vehicle:Vehicle vs. PQ (20mg/kg):Vehicle	108.7	61.58 to 155.9	Yes	****	<0.0001
ANOVA table	SS	DF	MS	F (DFn, DFd)	P value												Vehicle:Vehicle vs. PQ (20mg/kg):AU (1g/kg)	-1.496	-48.63 to 45.64	No	ns	>0.9999
Interaction	6909	1	6909	F (1, 28) = 6.265	P=0.0184												Vehicle:AU (1g/kg) vs. PQ (20mg/kg):Vehicle	160.2	113.0 to 207.3	Yes	****	<0.0001
PQ	50344	1	50344	F (1, 28) = 45.66	P<0.0001												Vehicle:AU (1g/kg) vs. PQ (20mg/kg):AU (1g/kg)	49.94	2.805 to 97.08	Yes	*	0.0331
AU	52261	1	52261	F (1, 28) = 47.39	P<0.0001												PQ (20mg/kg):Vehicle vs. PQ (20mg/kg):AU (1g/kg)	-110.2	-157.3 to -63.08	Yes	****	<0.0001
Residual	30876	28	1103
Difference between column means																	Test details	Mean 1	Mean 2	Mean Diff.	SE of diff.	N1	N2	t	DF
Mean of Vehicle	152.2
Mean of AU (1g/kg)	233.1																Vehicle:Vehicle vs. Vehicle:AU (1g/kg)	206.6	258	-51.44	16.6	8	8	3.098	28
Difference between means	-80.83																Vehicle:Vehicle vs. PQ (20mg/kg):Vehicle	206.6	97.89	108.7	16.6	8	8	6.548	28
SE of difference	11.74																Vehicle:Vehicle vs. PQ (20mg/kg):AU (1g/kg)	206.6	208.1	-1.496	16.6	8	8	0.09012	28
95% CI of difference	-104.9 to -56.78																Vehicle:AU (1g/kg) vs. PQ (20mg/kg):Vehicle	258	97.89	160.2	16.6	8	8	9.646	28
																	Vehicle:AU (1g/kg) vs. PQ (20mg/kg):AU (1g/kg)	258	208.1	49.94	16.6	8	8	3.008	28
Difference between row means																	PQ (20mg/kg):Vehicle vs. PQ (20mg/kg):AU (1g/kg)	97.89	208.1	-110.2	16.6	8	8	6.638	28
Mean of Vehicle	232.3
Mean of PQ (20mg/kg)	153
Difference between means	79.33
SE of difference	11.74
95% CI of difference	55.28 to 103.4
Interaction CI
Mean diff, A1 - B1	-51.44
Mean diff, A2 - B2	-110.2
(A1 -B1) - (A2 - B2)	58.78
95% CI of difference	10.68 to 106.9
(B1 - A1) - (B2 - A2)	-58.78
95% CI of difference	-106.9 to -10.68
