# Supplementary material for: Bioactive strawberry fruit (Arbutus unedo L.) extract remedies paraquat-induced neurotoxicity in the offspring prenatally exposed rats
Source: Front Neurosci. 2023 Oct 12;17:1244603. doi: 10.3389/fnins.2023.1244603 (PMC10600521; doi:10.3389/fnins.2023.1244603)
Supplement: Supplementary file 9 [file Data_Sheet_9.xlsx]

## Sheet: Feuil1
AU extract
DPPH test			ABTS test
Y = 0.4062*X + 48.11	Y = 0.4097*X + 47.80	Y = 0.4080*X + 47.86	Y = 0.6996*X + 41.70	Y = 0.6956*X + 42.03	Y = 0.6935*X + 42.15
4.65288	5.36978	5.2451	11.8639	11.4577	11.3194
Ascorbic Acid
Y = 3.156*X + 40.97	Y = 3.096*X + 41.42	Y = 3.110*X + 41.40	Y = 6.985*X + 7.877	Y = 7.082*X + 6.694	Y = 7.010*X + 7.025
2.86122	2.77132	2.76527	6.03049	5.53785	6.13053
